# Supplementary material for: National and regional prevalence of gestational diabetes mellitus in India: a systematic review and Meta-analysis
Source: Springer Nature journal article supplement (doi:10.1186/s12889-024-18024-9), 2024-02-20
Supplement: MOESM1 [file 26754804]

## **Additional File 1**

**Search strategy used for different databases are listed below: -**

### **PubMed:**

((Gestational Diabetes Mellitus) OR (GDM)) OR (Gestational diabet\*) OR (pregnancy induced diabet\*) OR (hyperglycemia during pregnancy) OR (impaired glucose tolerance) OR (gestational hyperglycemia) OR (glucose intolerance in pregnancy) OR (DIABET\*) OR (Gestational glucose intolerance) OR (postpartum diabetes)

AND ((pregnant woman) OR (pregnancy complications)) OR (pregnancy) OR (gestation\*) OR (gravid\*)

AND ((prevalence) OR (epidemi\*))

AND (India) OR (India\*) OR (Andhra Pradesh) OR (Arunachal Pradesh) OR (Assam) OR (Bihar) OR (Chhattisgarh) OR (Goa) OR (Gujarat) OR (Haryana) OR (Himachal Pradesh) OR (Jharkhand) OR (Karnataka) OR (Kerala) OR (Madhya Pradesh) OR (Maharashtra) OR (Manipur) OR (Meghalaya) OR (Mizoram) OR (Nagaland) OR (Odisha) OR (Punjab) OR (Rajasthan) OR (Sikkim) OR (Tamil Nadu) OR (Telangana) OR (Tripura) OR (Uttarakhand) OR (Uttar Pradesh) OR (West Bengal) OR (Andaman and Nicobar Islands) OR (Chandigarh) OR (Dadara and Nagar Haveli) OR (Daman and Diu) OR (Delhi) OR (Jammu and Kashmir) OR (Ladakh) OR (Lakshadweep) OR (Puducherry)

AND ((ffrft[Filter]) AND (fha[Filter]) AND (bookdocs[Filter]) AND (observationalstudy[Filter]) AND (fft[Filter]) AND (humans[Filter]) AND (Medline[Filter]))

Filters: Abstract, Free full text, Full text, Books and Documents, Observational Study, Humans, MEDLINE

### **Scopus:**

(TITLE-ABS-KEY ("Pregnant Women" OR "Gravidity" OR "Pregnancy" OR "Pregnant"))

AND TITLE-ABS-KEY ("Gestational Diabetes Mellitus" OR "GDM" OR "impaired glucose tolerance" OR "gestational hyperglycemia" OR "hyperglycemia in pregnancy" OR "glucose intolerance" )

AND ("prevalence")

AND TITLE-ABS-KEY ( "India" OR "Andhra Pradesh" OR "Arunachal Pradesh" OR "Assam" OR "Bihar" OR "Chhattisgarh" OR "Goa" OR "Gujarat" OR "Haryana" OR "Himachal Pradesh" OR "Jharkhand" OR "Karnataka" OR "Kerala" OR "Madhya Pradesh" OR "Maharashtra" OR "Manipur" OR "Meghalaya" OR "Mizoram" OR "Nagaland" OR "Odisha" OR "Punjab" OR "Rajasthan" OR "Sikkim" OR "Tamil Nadu" OR "Telangana" OR "Tripura" OR "Uttarakhand" OR "Uttar Pradesh" OR "West Bengal" OR "Andaman

Nicobar Islands" OR "Chandigarh" OR "Dadara Nagar Haveli" OR "Daman Diu" OR "Delhi" OR "Jammu Kashmir" OR "Ladakh" OR "Lakshadweep" OR "Puducherry" ))

**Google Scholar:**

allinTitle: Gestational+Diabetes+Mellitus+India

**ShodhGanga:**

Gestational Diabetes Mellitus + Prevalence.
